# Supplementary material
Source: ML conference proceedings conference paper supplement (https://proceedings.neurips.cc/paper_files/paper/2019/hash/c46482dd5d39742f0bfd417b492d0e8e-Abstract.html)
Supplement: Supplementary file [file c46482dd5d39742f0bfd417b492d0e8e-Supplemental.zip]

---

# Supplemental Material

---

## 1 ALGORITHMS FOR TRAINING DASCN

We describe the detailed algorithm for training DASCN as following:

---

**Algorithm 1** Training processing of the proposed DASCN

---

**Input:** the maximal loops  $M$ , the batch size  $m$ , the primal GAN with generator parameters  $\theta_A$ , discriminator parameters  $\omega_A$  and iteration  $n_1$ , the dual GAN with generator parameters  $\theta_B$  and discriminator parameters  $\omega_B$  and iteration  $n_2$ .

randomly initialize  $\omega_t, \theta_t, t \in A, B$

```
1: for iter=1 to  $M$  do
2:   for i=1 to  $n_1$  do
3:     Sample a minibatch of  $x$ , matched  $a$ , random noise  $z$ 
4:      $x' \leftarrow G_{SV}(a, z)$ 
5:     Update  $\omega_A$  to minimize Eq. (6)
6:   end for
7:   for j=1 to  $n_2$  do
8:     Sample random noise  $z$ 
9:      $a' \leftarrow G_{VS}(G_{SV}(a, z))$ 
10:    Update  $\omega_B$  to minimize Eq. (8)
11:   end for
12:   Sample random noise  $z$ 
13:    $a' \leftarrow G_{VS}(G_{SV}(a, z))$ 
14:   Update  $\theta_B$  to minimize Eq. (9)
15:   Sample random noise  $z, z'$ 
16:    $x' \leftarrow G_{SV}(a, z)$ 
17:    $x'' \leftarrow G_{SV}(G_{VS}(G_{SV}(a, z)), z')$ 
18:   Update  $\theta_A$  to minimize Eq. (7)
19: end for
```

---
